# Supplementary material for: Role of targeted and universal mupirocin-based decolonization for preventing surgical-site infections in patients undergoing cardiothoracic surgery: A systematic review and meta-analysis
Source: PubMed Central journal article supplement — Exp Ther Med. 2021 Feb 25;21(5):416. doi: 10.3892/etm.2021.9860 (PMC7967856; doi:10.3892/etm.2021.9860), 2021-02-25
Supplement: Supplementary_Data.pdf [file Supplementary_Data.pdf]

Table SI. Search strategy and PubMed database search results.

| Query                                                         | Search terms                                                                                                                                                                                                                                                                                                                                                                                                                                                                                                                                                                                                                                                                                                                                                                                                                                                                                                          | Results (n) |
|---------------------------------------------------------------|-----------------------------------------------------------------------------------------------------------------------------------------------------------------------------------------------------------------------------------------------------------------------------------------------------------------------------------------------------------------------------------------------------------------------------------------------------------------------------------------------------------------------------------------------------------------------------------------------------------------------------------------------------------------------------------------------------------------------------------------------------------------------------------------------------------------------------------------------------------------------------------------------------------------------|-------------|
| (Cardiac surgery)<br>(nasal<br>decolonization)                | ((((((('thoracic surgery'[MeSH Terms] OR ('thoracic'[All Fields] AND 'surgery'[All Fields]))<br>OR 'thoracic surgery'[All Fields]) OR ('cardiac'[All Fields] AND 'surgery'[All Fields]))<br>OR 'cardiac surgery'[All Fields]) OR 'cardiac surgical procedures'[MeSH Terms])<br>OR (('cardiac'[All Fields] AND 'surgical'[All Fields]) AND 'procedures'[All Fields]))<br>OR 'cardiac surgical procedures'[All Fields]) OR ('cardiac'[All Fields] AND<br>'surgery'[All Fields])) AND (((((((('nasalance'[All Fields] OR 'nasality'[All Fields])<br>OR 'nasalization'[All Fields]) OR 'nasalized'[All Fields]) OR 'nasally'[All Fields])<br>OR 'nose'[MeSH Terms]) OR 'nose'[All Fields]) OR 'nasal'[All Fields]) OR<br>'nasals'[All Fields]) AND (((('decolonization'[All Fields] OR 'decolonize'[All Fields])<br>OR 'decolonized'[All Fields]) OR 'decolonizing'[All Fields]))                                         | 18          |
| (cardiovascular<br>surgery) AND<br>(nasal<br>decolonization)  | ((('cardiovascular surgical procedures'[MeSH Terms] OR (('cardiovascular'[All Fields]<br>procedures'[All Fields]) OR ('cardiovascular'[All Fields] AND 'surgery'[All Fields]))<br>OR 'cardiovascular surgery'[All Fields]) AND (((((((('nasalance'[All Fields]<br>OR 'nasality'[All Fields]) OR 'nasalization'[All Fields]) OR 'nasalized'[All Fields])<br>OR 'nasally'[All Fields]) OR 'nose'[MeSH Terms]) OR 'nose'[All Fields]) OR<br>'nasal'[All Fields]) OR 'nasals'[All Fields]) AND (((('decolonization'[All Fields] OR<br>'decolonize'[All Fields]) OR 'decolonized'[All Fields]) OR 'decolonizing'[All Fields]))                                                                                                                                                                                                                                                                                             | 17          |
| (cardiothoracic<br>surgery) AND<br>(nasal<br>decolonization)  | ('cardiothoracic'[All Fields] AND (((((((('surgery'[MeSH Subheading] OR 'surgery'<br>[All Fields]) OR 'surgical procedures, operative'[MeSH Terms]) OR (('surgical'[All Fields]<br>AND 'procedures'[All Fields]) AND 'operative'[All Fields])) OR 'operative surgical<br>procedures'[All Fields]) OR 'general surgery'[MeSH Terms]) OR ('general'[All Fields]<br>AND 'surgery'[All Fields])) OR 'general surgery'[All Fields]) OR 'surgery s'[All Fields])<br>OR 'surgeries'[All Fields]) OR 'surgeries'[All Fields])) AND (((((((('nasalance'[All Fields]<br>OR 'nasality'[All Fields]) OR 'nasalization'[All Fields]) OR 'nasalized'[All Fields])<br>OR 'nasally'[All Fields]) OR 'nose'[MeSH Terms]) OR 'nose'[All Fields]) OR<br>'nasal'[All Fields]) OR 'nasals'[All Fields]) AND (((('decolonization'[All Fields] OR<br>'decolonize'[All Fields]) OR 'decolonized'[All Fields]) OR 'decolonizing'[All Fields])) | 7           |
| (cardiac surgery)<br>AND (mupirocin)                          | ((((((('thoracic surgery'[MeSH Terms] OR ('thoracic'[All Fields] AND 'surgery'[All Fields]))<br>OR 'thoracic surgery'[All Fields]) OR ('cardiac'[All Fields] AND 'surgery'[All Fields]))<br>OR 'cardiac surgery'[All Fields]) OR 'cardiac surgical procedures'[MeSH Terms])<br>OR (('cardiac'[All Fields] AND 'surgical'[All Fields]) AND 'procedures'[All Fields]))<br>OR 'cardiac surgical procedures'[All Fields]) OR ('cardiac'[All Fields] AND<br>'surgery'[All Fields])) AND (('mupirocin'[MeSH Terms] OR 'mupirocin'[All Fields])<br>OR 'mupirocine'[All Fields])                                                                                                                                                                                                                                                                                                                                              | 53          |
| (cardiovascular<br>surgery) AND<br>(mupirocin)                | ((('cardiovascular surgical procedures'[MeSH Terms] OR (('cardiovascular'[All Fields]<br>AND 'surgical'[All Fields]) AND 'procedures'[All Fields])) OR 'cardiovascular surgical<br>procedures'[All Fields]) OR ('cardiovascular'[All Fields] AND 'surgery'[All Fields]))<br>OR 'cardiovascular surgery'[All Fields]) AND (('mupirocin'[MeSH Terms]<br>OR 'mupirocin'[All Fields]) OR 'mupirocine'[All Fields])                                                                                                                                                                                                                                                                                                                                                                                                                                                                                                        | 62          |
| (cardiothoracic<br>surgery) AND<br>(mupirocin)                | ('cardiothoracic'[All Fields] AND (((((((('surgery'[MeSH Subheading] OR 'surgery'<br>[All Fields]) OR 'surgical procedures, operative'[MeSH Terms]) OR (('surgical'[All Fields]<br>AND 'procedures'[All Fields]) AND 'operative'[All Fields])) OR 'operative surgical<br>procedures'[All Fields]) OR 'general surgery'[MeSH Terms]) OR ('general'[All Fields]<br>AND 'surgery'[All Fields])) OR 'general surgery'[All Fields]) OR 'surgery s'[All Fields])<br>OR 'surgeries'[All Fields]) OR 'surgeries'[All Fields])) AND (('mupirocin'[MeSH Terms]<br>OR 'mupirocin'[All Fields]) OR 'mupirocine'[All Fields])                                                                                                                                                                                                                                                                                                      | 22          |
| (cardiac surgery)<br>AND<br>(staphylococcus<br>aureus)        | ((((((('thoracic surgery'[MeSH Terms] OR ('thoracic'[All Fields] AND 'surgery'[All Fields]))<br>OR 'thoracic surgery'[All Fields]) OR ('cardiac'[All Fields] AND 'surgery'[All Fields]))<br>OR 'cardiac surgery'[All Fields]) OR 'cardiac surgical procedures'[MeSH Terms])<br>OR (('cardiac'[All Fields] AND 'surgical'[All Fields]) AND 'procedures'[All Fields])) OR<br>'cardiac surgical procedures'[All Fields]) OR ('cardiac'[All Fields] AND 'surgery'<br>[All Fields])) AND (('staphylococcus aureus'[MeSH Terms] OR ('staphylococcus'[All Fields]<br>AND 'aureus'[All Fields])) OR 'staphylococcus aureus'[All Fields])                                                                                                                                                                                                                                                                                      | 1,813       |
| (cardiovascular<br>surgery) AND<br>(staphylococcus<br>aureus) | ((('cardiovascular surgical procedures'[MeSH Terms] OR (('cardiovascular'[All Fields]<br>AND 'surgical'[All Fields]) AND 'procedures'[All Fields])) OR 'cardiovascular surgical<br>procedures'[All Fields]) OR ('cardiovascular'[All Fields] AND 'surgery'[All Fields])) OR<br>'cardiovascular surgery'[All Fields]) AND (('staphylococcus aureus'[MeSH Terms] OR<br>'staphylococcus aureus'[All Fields]) OR 'staphylococcus aureus'[All Fields])                                                                                                                                                                                                                                                                                                                                                                                                                                                                     | 1,991       |

Table SI. Continued.

| Query                                                    | Search terms                                                                                                                                                                                                                                                                                                                                                                                                                                                                                                                                                                                                                                                                                                                                                                                                                                                                                                                                                                                                                                                                                                                                                                                                                                                                                                                                                                                                                                                                                                                                                                                                                                                                 | Results (n) |
|----------------------------------------------------------|------------------------------------------------------------------------------------------------------------------------------------------------------------------------------------------------------------------------------------------------------------------------------------------------------------------------------------------------------------------------------------------------------------------------------------------------------------------------------------------------------------------------------------------------------------------------------------------------------------------------------------------------------------------------------------------------------------------------------------------------------------------------------------------------------------------------------------------------------------------------------------------------------------------------------------------------------------------------------------------------------------------------------------------------------------------------------------------------------------------------------------------------------------------------------------------------------------------------------------------------------------------------------------------------------------------------------------------------------------------------------------------------------------------------------------------------------------------------------------------------------------------------------------------------------------------------------------------------------------------------------------------------------------------------------|-------------|
| (cardiothoracic surgery) AND (staphylococcus aureus)     | ('cardiothoracic'[All Fields] AND (((((((('surgery'[MeSH Subheading] OR 'surgery'[All Fields]) OR 'surgical procedures, operative'[MeSH Terms]) OR (('surgical'[All Fields] AND 'procedures'[All Fields]) AND 'operative'[All Fields])) OR 'operative surgical procedures'[All Fields]) OR 'general surgery'[MeSH Terms]) OR ('general'[All Fields] AND 'surgery'[All Fields])) OR 'general surgery'[All Fields]) OR 'surgery s'[All Fields]) OR 'surgeries'[All Fields]) AND (('staphylococcus aureus'[MeSH Terms] OR ('staphylococcus'[All Fields] AND 'aureus'[All Fields])) OR 'staphylococcus aureus'[All Fields])                                                                                                                                                                                                                                                                                                                                                                                                                                                                                                                                                                                                                                                                                                                                                                                                                                                                                                                                                                                                                                                      | 302         |
| (cardiac surgery) AND (surgical site infection)          | ((((((('thoracic surgery'[MeSH Terms] OR ('thoracic'[All Fields] AND 'surgery'[All Fields]) OR 'thoracic surgery'[All Fields]) OR ('cardiac'[All Fields] AND 'surgery'[All Fields]) OR 'cardiac surgery'[All Fields]) OR 'cardiac surgical procedures'[MeSH Terms]) OR (('cardiac'[All Fields] AND 'surgical'[All Fields]) AND 'procedures'[All Fields])) OR 'cardiac surgical procedures'[All Fields]) OR ('cardiac'[All Fields] AND 'surgery'[All Fields])) AND (((('surgical wound infection'[MeSH Terms] OR (('surgical'[All Fields] AND 'wound'[All Fields]) AND 'infection'[All Fields])) OR 'surgical wound infection'[All Fields]) OR (('surgical'[All Fields] AND 'site'[All Fields]) AND 'infection'[All Fields])) OR 'surgical site infection'[All Fields])                                                                                                                                                                                                                                                                                                                                                                                                                                                                                                                                                                                                                                                                                                                                                                                                                                                                                                       | 5,534       |
| (cardiothoracic surgery) AND (surgical site infection)   | ('cardiothoracic'[All Fields] AND (((((((('surgery'[MeSH Subheading] OR 'surgery'[All Fields]) OR 'surgical procedures, operative'[MeSH Terms]) OR (('surgical'[All Fields] AND 'procedures'[All Fields]) AND 'operative'[All Fields])) OR 'operative surgical procedures'[All Fields]) OR 'general surgery'[MeSH Terms]) OR ('general'[All Fields] AND 'surgery'[All Fields])) OR 'general surgery'[All Fields]) OR 'surgery s'[All Fields]) OR 'surgeries'[All Fields]) AND (((('surgical wound infection'[MeSH Terms] OR (('surgical'[All Fields] AND 'wound'[All Fields]) AND 'infection'[All Fields])) OR 'surgical wound infection'[All Fields]) OR (('surgical'[All Fields] AND 'site'[All Fields]) AND 'infection'[All Fields])) OR 'surgical site infection'[All Fields])                                                                                                                                                                                                                                                                                                                                                                                                                                                                                                                                                                                                                                                                                                                                                                                                                                                                                           | 865         |
| ((cardiac surgery) AND (nasal carriers)) AND (infection) | ((((((('thoracic surgery'[MeSH Terms] OR ('thoracic'[All Fields] AND 'surgery'[All Fields]) OR 'thoracic surgery'[All Fields]) OR ('cardiac'[All Fields] AND 'surgery'[All Fields]) OR 'cardiac surgery'[All Fields]) OR 'cardiac surgical procedures'[MeSH Terms]) OR (('cardiac'[All Fields] AND 'surgical'[All Fields]) AND 'procedures'[All Fields])) OR 'cardiac surgical procedures'[All Fields]) OR ('cardiac'[All Fields] AND 'surgery'[All Fields])) AND (((((((('nasalance'[All Fields] OR 'nasality'[All Fields]) OR 'nasalization'[All Fields]) OR 'nasalized'[All Fields]) OR 'nasally'[All Fields]) OR 'nose'[MeSH Terms]) OR 'nose'[All Fields]) OR 'nasal'[All Fields]) OR 'nasals'[All Fields]) AND (((((((('carrier state'[MeSH Terms] OR ('carrier'[All Fields] AND 'state'[All Fields]) OR 'carrier state'[All Fields]) OR 'carrier'[All Fields]) OR 'carrier s'[All Fields]) OR 'heterozygote'[MeSH Terms]) OR 'heterozygote'[All Fields]) OR 'carriers'[All Fields])) AND (((((((('infect'[All Fields] OR 'infectability'[All Fields]) OR 'infectable'[All Fields]) OR 'infectant'[All Fields]) OR 'infectants'[All Fields]) OR 'infected'[All Fields]) OR 'infecteds'[All Fields]) OR 'infectibility'[All Fields]) OR 'infectible'[All Fields]) OR 'infecting'[All Fields]) OR 'infection s'[All Fields]) OR 'infections'[MeSH Terms]) OR 'infections'[All Fields]) OR 'infection'[All Fields]) OR 'infective'[All Fields]) OR 'infectiveness'[All Fields]) OR 'infectives'[All Fields]) OR 'infectivities'[All Fields]) OR 'infects'[All Fields]) OR 'pathogenicity'[MeSH Subheading]) OR 'pathogenicity'[All Fields]) OR 'infectivity'[All Fields]) | 49          |
| ((surgery) AND (mupirocin)) AND (infection)              | ((((((('surgery'[MeSH Subheading] OR 'surgery'[All Fields]) OR 'surgical procedures, operative'[MeSH Terms]) OR (('surgical'[All Fields] AND 'procedures'[All Fields]) AND 'operative'[All Fields])) OR 'operative surgical procedures'[All Fields]) OR 'general surgery'[MeSH Terms]) OR ('general'[All Fields] AND 'surgery'[All Fields])) OR 'general surgery'[All Fields]) OR 'surgery s'[All Fields]) OR 'surgeries'[All Fields]) AND (('mupirocin'[MeSH Terms] OR 'mupirocin'[All Fields]) OR 'mupirocine'[All Fields]) AND (((((((('infect'[All Fields] OR 'infectability'[All Fields]) OR 'infectable'[All Fields]) OR 'infectant'[All Fields]) OR 'infectants'[All Fields]) OR 'infected'[All Fields]) OR 'infecteds'[All Fields]) OR 'infectibility'[All Fields]) OR 'infectible'[All Fields]) OR 'infecting'[All Fields]) OR 'infection s'[All Fields]) OR 'infections'[MeSH Terms]) OR 'infections'[All Fields]) OR 'infection'[All Fields]) OR 'infective'[All Fields]) OR 'infectiveness'[All Fields]) OR 'infectives'[All Fields]) OR 'infectivities'[All Fields]) OR 'infects'[All Fields]) OR 'pathogenicity'[MeSH Subheading]) OR 'pathogenicity'[All Fields]) OR 'infectivity'[All Fields])                                                                                                                                                                                                                                                                                                                                                                                                                                                               | 339         |

Table SI. Continued.

| Query                            | Search terms                                                                                                                                                                                                                                                                                                                                                                                                                                                                                                                                                                                                                                                                                                                                                                                                                                                                                                                                                                                     | Results (n) |
|----------------------------------|--------------------------------------------------------------------------------------------------------------------------------------------------------------------------------------------------------------------------------------------------------------------------------------------------------------------------------------------------------------------------------------------------------------------------------------------------------------------------------------------------------------------------------------------------------------------------------------------------------------------------------------------------------------------------------------------------------------------------------------------------------------------------------------------------------------------------------------------------------------------------------------------------------------------------------------------------------------------------------------------------|-------------|
| (surgery) AND<br>(nasal carrier) | ((((((((('surgery'[MeSH Subheading] OR 'surgery'[All Fields]) OR 'surgical procedures, operative'[MeSH Terms]) OR (('surgical'[All Fields] AND 'procedures'[All Fields]) AND 'operative'[All Fields])) OR 'operative surgical procedures'[All Fields]) OR 'general surgery'[MeSH Terms]) OR ('general'[All Fields] AND 'surgery'[All Fields])) OR 'general surgery'[All Fields]) OR 'surgery s'[All Fields]) OR 'surgerys'[All Fields]) OR 'surgeries'[All Fields]) AND (((((((('nasalance'[All Fields] OR 'nasality'[All Fields]) OR 'nasalization'[All Fields]) OR 'nasalized'[All Fields]) OR 'nasally'[All Fields]) OR 'nose'[MeSH Terms]) OR 'nose'[All Fields]) OR 'nasal'[All Fields]) OR 'nasals'[All Fields]) AND \((((('carrier state'[MeSH Terms] OR ('carrier'[All Fields] AND 'state'[All Fields])) OR 'carrier state'[All Fields]) OR 'carrier'[All Fields]) OR 'carrier s'[All Fields]) OR 'heterozygote'[MeSH Terms]) OR 'heterozygote'[All Fields]) OR 'carriers'[All Fields])) | 589         |

Table SII. Risk of bias in included studies.

| A, RCTs                       |                            |                        |                                        |                                |                         |                             |
|-------------------------------|----------------------------|------------------------|----------------------------------------|--------------------------------|-------------------------|-----------------------------|
| Study                         | Random sequence generation | Allocation concealment | Blinding of participants and personnel | Blinding of outcome assessment | Incomplete outcome data | Selective reporting         |
| Konvalinka <i>et al</i> (13)  | Low risk                   | Unclear risk           | Low risk                               | Low risk                       | Low risk                | Unclear risk                |
| Bode <i>et al</i> (12)        | Low risk                   | Unclear risk           | Low risk                               | Low risk                       | Low risk                | Low risk                    |
| B, Non-RCTs                   |                            |                        |                                        |                                |                         |                             |
| Study                         | Selection of participants  | Confounding variables  | Intervention measurements              | Blinding of outcome assessment | Incomplete outcome data | Selective outcome reporting |
| Nicholas <i>et al</i> (35)    | Low risk                   | High risk              | Low risk                               | High risk                      | High risk               | High risk                   |
| Saraswat <i>et al</i> (34)    | High risk                  | Low risk               | Low risk                               | High risk                      | Low risk                | Unclear risk                |
| Schweizer <i>et al</i> (33)   | High risk                  | High risk              | Low risk                               | High risk                      | High risk               | Unclear risk                |
| Jog <i>et al</i> (32)         | High risk                  | High risk              | Low risk                               | High risk                      | Low risk                | Unclear risk                |
| Shrestha <i>et al</i> (31)    | Low risk                   | High risk              | Low risk                               | High risk                      | Low risk                | Unclear risk                |
| Nicholson <i>et al</i> (30)   | High risk                  | High risk              | Low risk                               | High risk                      | Low risk                | Unclear risk                |
| Lemaignen <i>et al</i> (14)   | High risk                  | Low risk               | High risk                              | High risk                      | Low risk                | Unclear risk                |
| Kohler <i>et al</i> (29)      | High risk                  | Low risk               | Low risk                               | High risk                      | High risk               | Unclear risk                |
| Thompson <i>et al</i> (27)    | High risk                  | High risk              | Low risk                               | High risk                      | Low risk                | Unclear risk                |
| Walsh <i>et al</i> (28)       | High risk                  | High risk              | Low risk                               | High risk                      | Low risk                | Unclear risk                |
| Coskun <i>et al</i> (25)      | High risk                  | High risk              | Low risk                               | High risk                      | Unclear risk            | Unclear risk                |
| Martorell <i>et al</i> (26)   | High risk                  | High risk              | Low risk                               | High risk                      | Low risk                | Unclear risk                |
| Usry <i>et al</i> (23)        | High risk                  | High risk              | Unclear risk                           | High risk                      | Unclear risk            | Unclear risk                |
| Cimochowski <i>et al</i> (24) | High risk                  | High risk              | Low risk                               | High risk                      | High risk               | Unclear risk                |
| Kluytmans <i>et al</i> (36)   | High risk                  | High risk              | Low risk                               | High risk                      | High risk               | Unclear risk                |

RCT, randomized controlled trial.
